# Supplementary material
Source: Springer Nature journal article supplement (https://www.springermedizin.de/resource/supplementary/12943_2013_1131_MOESM1_ESM.pdf/9552562)

**A**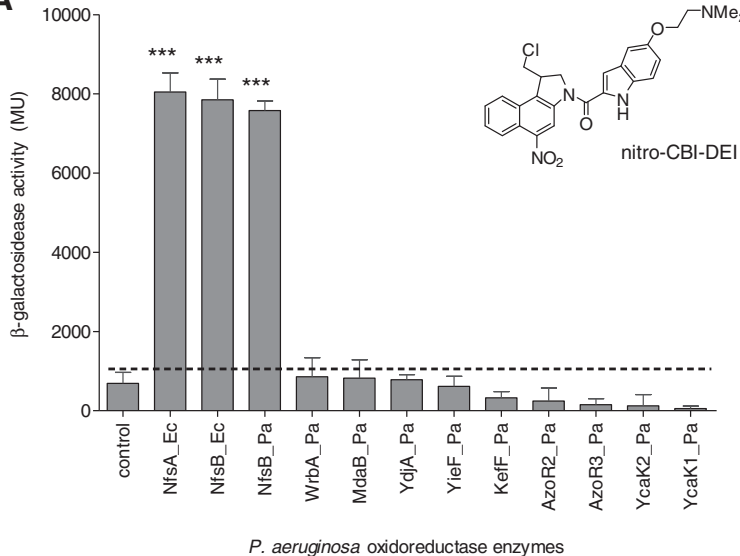**B**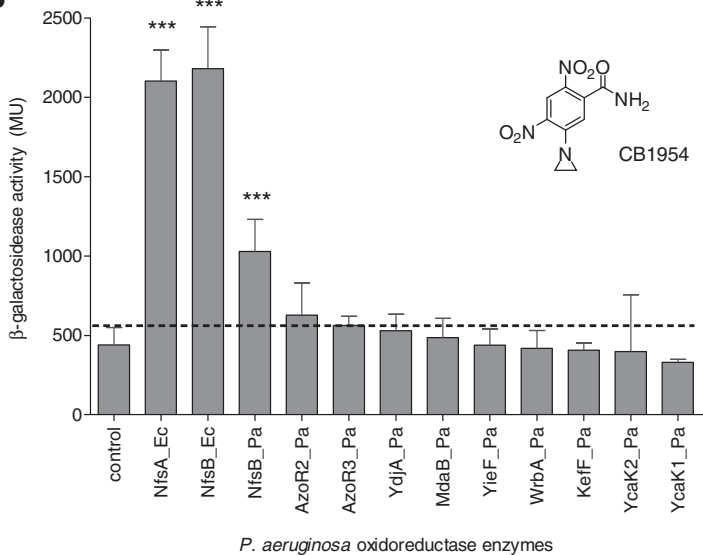

Supplement: MOESM1 [file 9552562]
